# Supplementary material for: The Structural Effect of FLT3 Mutations at 835th Position and Their Interaction with Acute Myeloid Leukemia Inhibitors: In Silico Approach
Source: MDPI journal article supplement (doi:10.3390/ijms22147602), 2021-07-15

**Table S1: The docking score, number of B-bonds, and interactive residues of native and mutant of FLT3 proteins with Crenolanib inhibitor**

| Complex Types     | Parameters               |               |                           |
|-------------------|--------------------------|---------------|---------------------------|
|                   | docking score (kcal/mol) | No of H-Bonds | Interactive residues      |
| Native-Crenolanib | -8.9                     | 3             | ASN-626, LYS-644, ALA-833 |
| D835A-Crenolanib  | -8.5                     | 2             | ILE-632, ASN-676          |
| D835E-Crenolanib  | -10.4                    | 3             | LYS-614, PHE-760, ALA-833 |
| D835F-Crenolanib  | -9.7                     | 1             | TYR-842                   |
| D835G-Crenolanib  | -10.2                    | 2             | GLN-640, ASN-758          |
| D835H-Crenolanib  | -9.2                     | 2             | HIS-756, ASP-764          |
| D835I-Crenolanib  | -9.0                     | 3             | GLU-661, VAL-801, HIS-809 |
| D835N-Crenolanib  | -9.6                     | 1             | LYS-644                   |
| D835V-Crenolanib  | -10.4                    | 2             | ARG-704, ALA-833          |
| D835Y-Crenolanib  | -8.9                     | 2             | ARG-807, ASN-887          |

| Complex Types (0ns) | Parameters               |               |                           |
|---------------------|--------------------------|---------------|---------------------------|
|                     | docking score (kcal/mol) | No of H-Bonds | Interactive residues      |
| Native-FF-10101     | -8.3                     | 2             | ASN-626, CYS-695          |
| D835A-FF-10101      | -5.8                     | 1             | SER-670                   |
| D835E-FF-10101      | -7.7                     | 2             | ALA-620, HIS-809          |
| D835F-FF-10101      | -7.8                     | 2             | CYS-694, GLU-765          |
| D835G-FF-10101      | -5.9                     | 1             | GLN-640                   |
| D835H-FF-10101      | -7.6                     | 1             | GLU-765                   |
| D835I-FF-10101      | -8.6                     | 2             | GLU-661, VAL-808          |
| D835N-FF-10101      | -8.2                     | 0             | -                         |
| D835V-FF-10101      | -8.8                     | 3             | LYS-644, ASP-698, ARG-834 |
| D835Y-FF-10101      | -8.3                     | 2             | CYS-694, ARG-815          |

**Table S2: The docking score, number of B-bonds, and interactive residues of native and mutant of FLT3 proteins with FF-10101inhibitor**

**Table S3: The docking score, number of B-bonds, and interactive residues of native and mutant of FLT3 proteins with Gilteritinib inhibitor**

| Complex Types (0ns)  | Parameters               |               |                           |
|----------------------|--------------------------|---------------|---------------------------|
|                      | docking score (kcal/mol) | No of H-Bonds | Interactive residues      |
| Native- Gilteritinib | -8.5                     | 2             | GLU-765, ALA-833          |
| D835A-Gilteritinib   | -6.7                     | 1             | GLU-692                   |
| D835E-Gilteritinib   | -7.3                     | 2             | GLU-654, LEU-832          |
| D835F-Gilteritinib   | -8.1                     | 3             | CYS-694, ASP-698          |
| D835G-Gilteritinib   | -7.6                     | 2             | CYS-835, ASP-839          |
| D835H-Gilteritinib   | -9.3                     | 2             | GLU-765, ARG-815          |
| D835I-Gilteritinib   | -8.0                     | 2             | PHE-621, GLY-831          |
| D835N-Gilteritinib   | -4.8                     | 1             | ASP-829                   |
| D835V-Gilteritinib   | -9.6                     | 3             | LEU-616, ASP-698, LEU-755 |
| D835Y-Gilteritinib   | -8.9                     | 2             | ASP-750, ASN-887          |

**Table S4: The docking score, number of B-bonds, and interactive residues of native and mutant of FLT3 proteins with KW-2449 inhibitor**

| Complex Types (0ns) | Parameters               |               |                      |
|---------------------|--------------------------|---------------|----------------------|
|                     | docking score (kcal/mol) | No of H-Bonds | Interactive residues |
| Native- KW-2449     | -9.9                     | 2             | GLU-692, HIS-761     |
| D835A- KW-2449      | -8.8                     | 1             | GLN-667              |
| D835E- KW-2449      | -10.7                    | 2             | TYR-693, ASP-829     |
| D835F- KW-2449      | -9.2                     | 1             | TYR-842              |
| D835G- KW-2449      | -9.9                     | 1             | CYS-694              |
| D835H- KW-2449      | -8.3                     | 1             | GLU-765              |
| D835I- KW-2449      | -8.7                     | 1             | GLU-661              |
| D835N- KW-2449      | -9.5                     | 2             | GLU-692, SER-736     |
| D835V- KW-2449      | -10.6                    | 2             | TYR-591, ILE-827     |
| D835Y- KW-2449      | -9.5                     | 1             | CYS-694              |

**Table S5: The docking score, number of B-bonds, and interactive residues of native and mutant of FLT3 proteins with PLX3397 inhibitor**

| Complex Types (0ns) | Parameters               |               |                           |
|---------------------|--------------------------|---------------|---------------------------|
|                     | docking score (kcal/mol) | No of H-Bonds | Interactive residues      |
| Native- PLX3397     | -9.7                     | 2             | LEU-616, CYS-694          |
| D835A- PLX3397      | -9.6                     | 1             | SER-806                   |
| D835E- PLX3397      | -10.1                    | 3             | CYS-694, ASP-698, ARG-815 |
| D835F- PLX3397      | -9.2                     | 2             | CYS-694, HIS-761          |
| D835G- PLX3397      | -9.9                     | 2             | ASP829, GLY-831           |
| D835H- PLX3397      | -9.0                     | 1             | ASP-698                   |
| D835I- PLX3397      | -9.9                     | 1             | ILE-827                   |
| D835N- PLX3397      | -9.8                     | 1             | LEU-616                   |
| D835V- PLX3397      | -10.1                    | 2             | CYS-695                   |
| D835Y- PLX3397      | -10.1                    | 3             | LEU-616, ASP-750          |

**Table S6: The docking score, number of B-bonds, and interactive residues of native and mutant of FLT3 proteins with Ponatinib inhibitor**

| Complex Types (0ns) | Parameters               |               |                      |
|---------------------|--------------------------|---------------|----------------------|
|                     | docking score (kcal/mol) | No of H-Bonds | Interactive residues |
| Native- Ponatinib   | -10.3                    | 2             | CYS-695, GLU-765     |
| D835A- Ponatinib    | -7.5                     | 1             | GLY-669              |
| D835E- Ponatinib    | -7.9                     | 1             | ARG-834              |
| D835F- Ponatinib    | -8.4                     | 1             | CYS-695              |
| D835G- Ponatinib    | -8.4                     | 1             | ARG-834              |
| D835H- Ponatinib    | -10.1                    | 2             | ASP-698, ASN-701     |
| D835I- Ponatinib    | -10.0                    | 1             | ASP-829              |
| D835N- Ponatinib    | -7.7                     | 1             | ASP-829              |
| D835V- Ponatinib    | -12.2                    | 2             | TYR-693, ASP-698     |
| D835Y- Ponatinib    | -9.9                     | 1             | LEU-616              |

**Table S7: The docking score, number of B-bonds, and interactive residues of native and mutant of FLT3 proteins with Quizartinib inhibitor**

| Complex Types (0ns) | Parameters               |               |                           |
|---------------------|--------------------------|---------------|---------------------------|
|                     | docking score (kcal/mol) | No of H-Bonds | Interactive residues      |
| Native-Quizartinib  | -9.5                     | 2             | GLN-640, ARG-834          |
| D835A-Quizartinib   | -7.3                     | 1             | LYS-826                   |
| D835E-Quizartinib   | -6.4                     | 1             | SER-653                   |
| D835F-Quizartinib   | -8.4                     | 1             | CYS-695                   |
| D835G-Quizartinib   | -3.8                     | 0             | -                         |
| D835H-Quizartinib   | -9.5                     | 3             | CYS-695, ARG-834, ASN-841 |
| D835I-Quizartinib   | -8.2                     | 1             | GLU-692                   |
| D835N-Quizartinib   | -5.0                     | 1             | VAL-675                   |
| D835V-Quizartinib   | -10.5                    | 2             | CYS-695, ASP-698          |
| D835Y-Quizartinib   | -11.1                    | 1             | GLU-692                   |

**Table S8: The docking score, number of B-bonds, and interactive residues of native and mutant of FLT3 proteins with Sorafenib inhibitor**

| Complex Types (0ns) | Parameters               |               |                           |
|---------------------|--------------------------|---------------|---------------------------|
|                     | docking score (kcal/mol) | No of H-Bonds | Interactive residues      |
| Native-Sorafenib    | -10.4                    | 2             | CYS-695, GLU-765          |
| D835A-Sorafenib     | -8.3                     | 1             | GLU-672                   |
| D835E-Sorafenib     | -8.3                     | 1             | TYR-842                   |
| D835F-Sorafenib     | -9.2                     | 2             | ASP-829                   |
| D835G-Sorafenib     | -10.5                    | 4             | SER-653, GLU-661          |
| D835H-Sorafenib     | -9.5                     | 1             | ASN-701                   |
| D835I-Sorafenib     | -10.8                    | 3             | LEU-616, GLU-661, ASP-829 |
| D835N-Sorafenib     | -9.7                     | 2             | VAL-808                   |
| D835V-Sorafenib     | -10.8                    | 2             | ASP-698, ARG-815          |
| D835Y-Sorafenib     | -10.4                    | 2             | LEU-616, ARG-704          |

**Table S9: The docking score, number of B-bonds, and interactive residues of native and mutant of FLT3 proteins with Sunitinib inhibitor.**

| Complex Types (0ns) | Parameters               |               |                           |
|---------------------|--------------------------|---------------|---------------------------|
|                     | docking score (kcal/mol) | No of H-Bonds | Interactive residues      |
| Native-Sunitinib    | -8.3                     | 2             | CYS-694, HIS-761          |
| D835A-Sunitinib     | -6.4                     | 1             | GLU-692                   |
| D835E-Sunitinib     | -9.3                     | 3             | GLU-654, ASP-811, GLY-831 |
| D835F-Sunitinib     | -8.1                     | 2             | HIS-761, GLU-765          |
| D835G-Sunitinib     | -9.4                     | 2             | LEU-616, ARG-815          |
| D835H-Sunitinib     | -8.0                     | 1             | ARG-815                   |
| D835I-Sunitinib     | -8.4                     | 2             | LYS-644, ASP-829          |
| D835N-Sunitinib     | -8.3                     | 2             | LYS-644, HIS-809          |
| D835V-Sunitinib     | -9.0                     | 1             | ASP-829                   |
| D835Y-Sunitinib     | -8.7                     | 3             | ASP-698, ASN-701, ASP-750 |

| Complex Types (0ns) | Parameters               |               |                      |
|---------------------|--------------------------|---------------|----------------------|
|                     | docking score (kcal/mol) | No of H-Bonds | Interactive residues |
| Native-Tandutinib   | -9.6                     | 2             | GLU-692, CYS-694     |
| D835A-Tandutinib    | -7.1                     | 1             | LYS-826              |
| D835E-Tandutinib    | -7.5                     | 0             | -                    |
| D835F-Tandutinib    | -7.4                     | 1             | GLU-776              |
| D835G-Tandutinib    | -7.2                     | 1             | TYR-693              |
| D835H-Tandutinib    | -8.7                     | 1             | HIS-756              |
| D835I-Tandutinib    | -9.8                     | 1             | GLU-661              |
| D835N-Tandutinib    | -8.6                     | 1             | ASP-829              |
| D835V-Tandutinib    | -9.9                     | 2             | ASN-758, ARG-834     |
| D835Y-Tandutinib    | -9.3                     | 1             | CYS-694              |

**Table S10: The docking score, number of B-bonds, and interactive residues of native and mutant of FLT3 proteins with Tandutinib inhibitor**

## Supplementary Figures

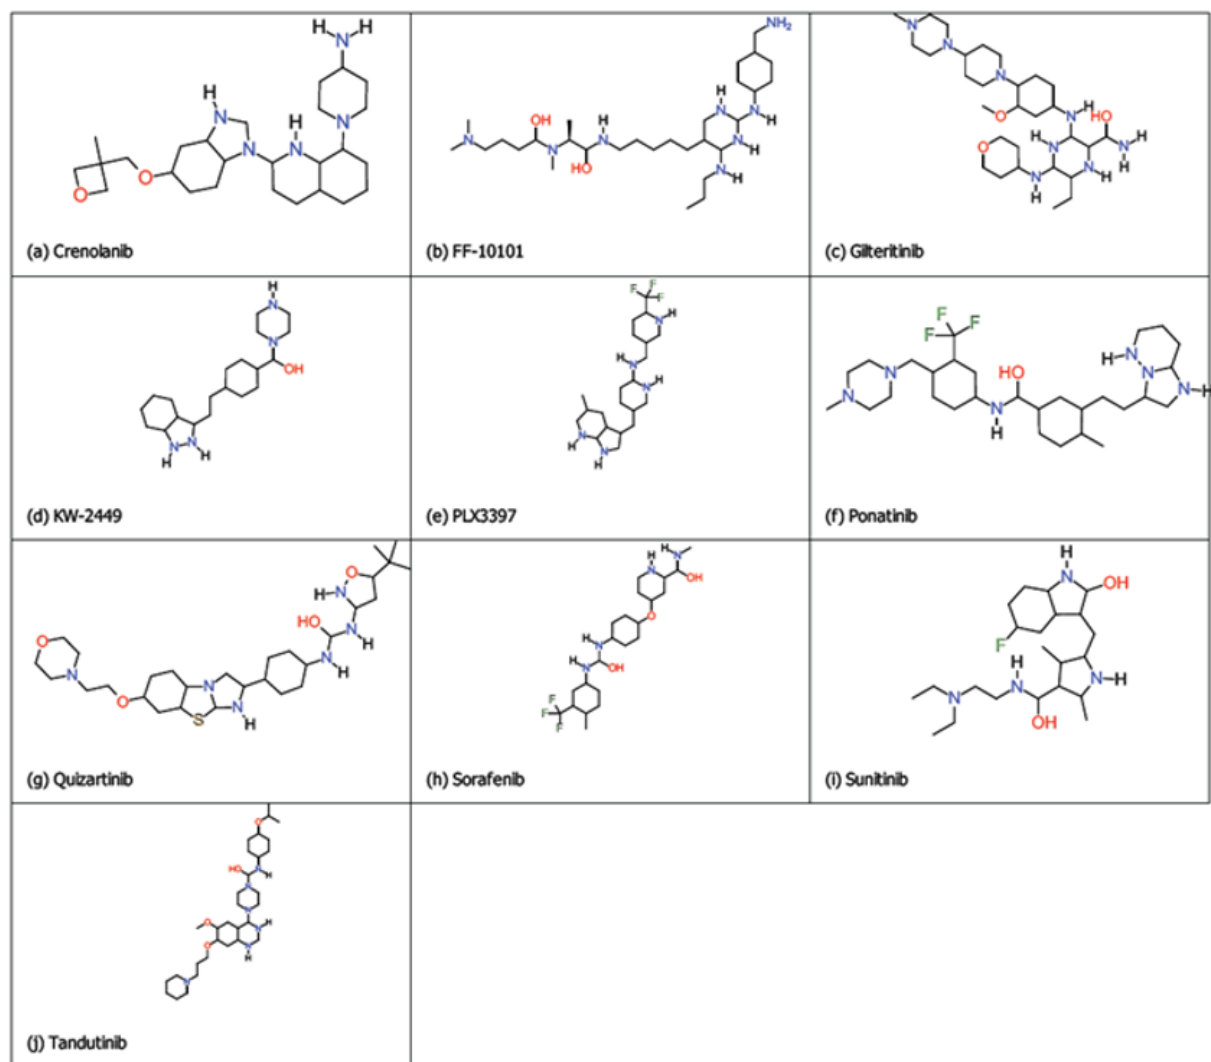

**Figure S1:** The list of FLT3 inhibitors

**Figure S2:** The interaction of native FLT3 proteins with AML inhibitors. The native structure was shown in cartoon style (grey) and AML inhibitors were displayed in stick style. The interactive residues of native FLT3 were represented in stick model along with the residues label.

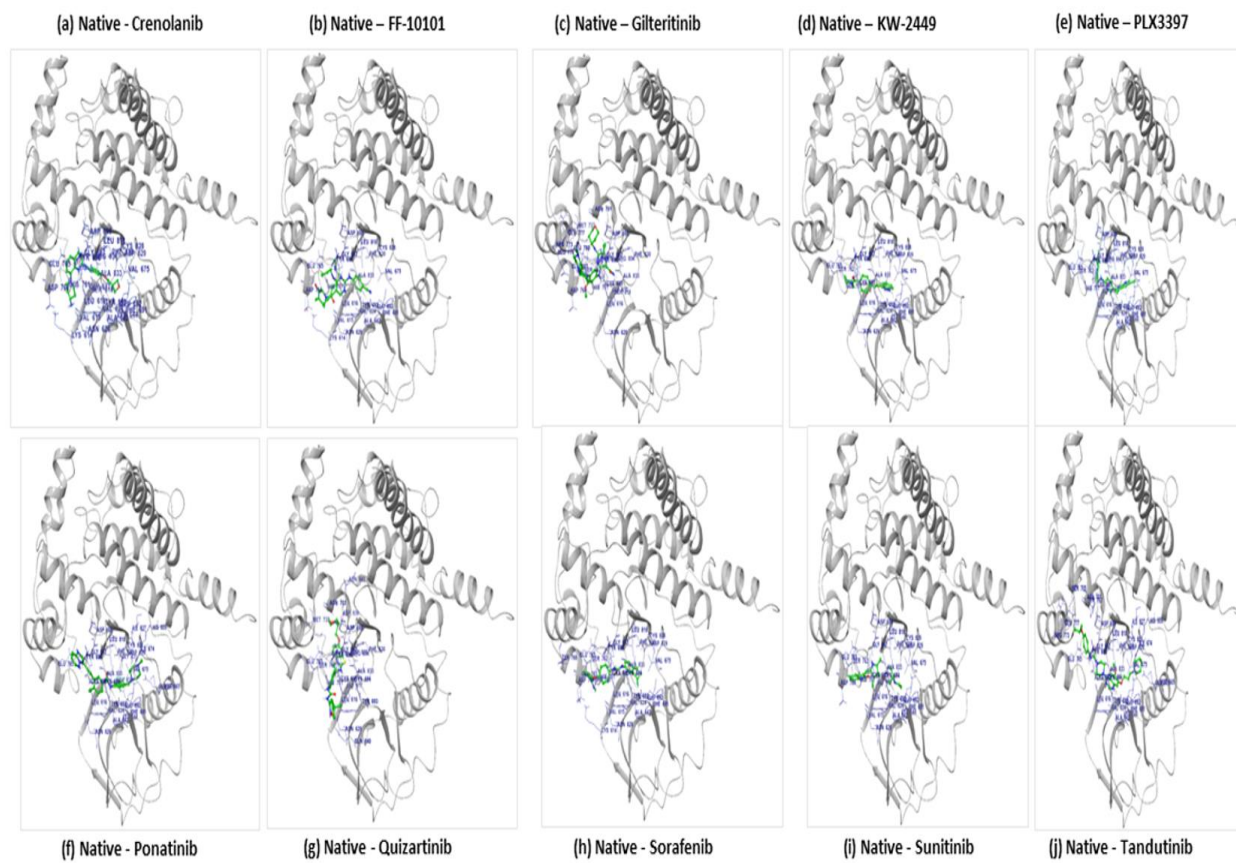

**Figure S3:** The interaction of mutant (D835A) FLT-3 proteins with AML inhibitors. The D835A-mutant FLT-3 structure was shown in cartoon style (red) and AML inhibitors were displayed in stick style. The interactive residues of native FLT3 were represented in stick model along with the residues label.

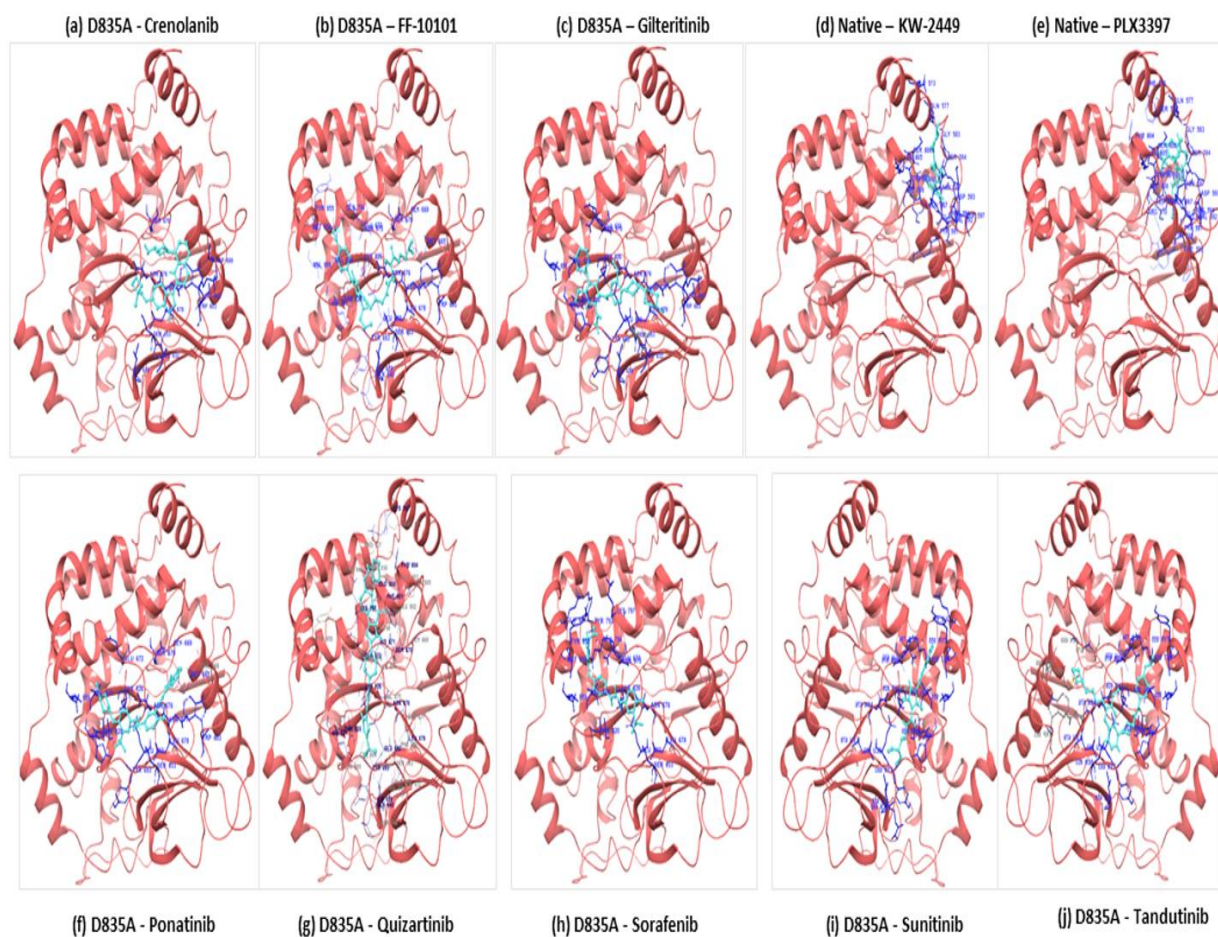



**Figure S4:** The interaction of 835E-mutant FLT3 proteins with AML inhibitors. The D835E-mutant FLT3 structure was shown in cartoon style (Lemon green) and AML inhibitors were displayed in stick style. The interactive residues of native FLT3 were represented in stick model along with the residues label.

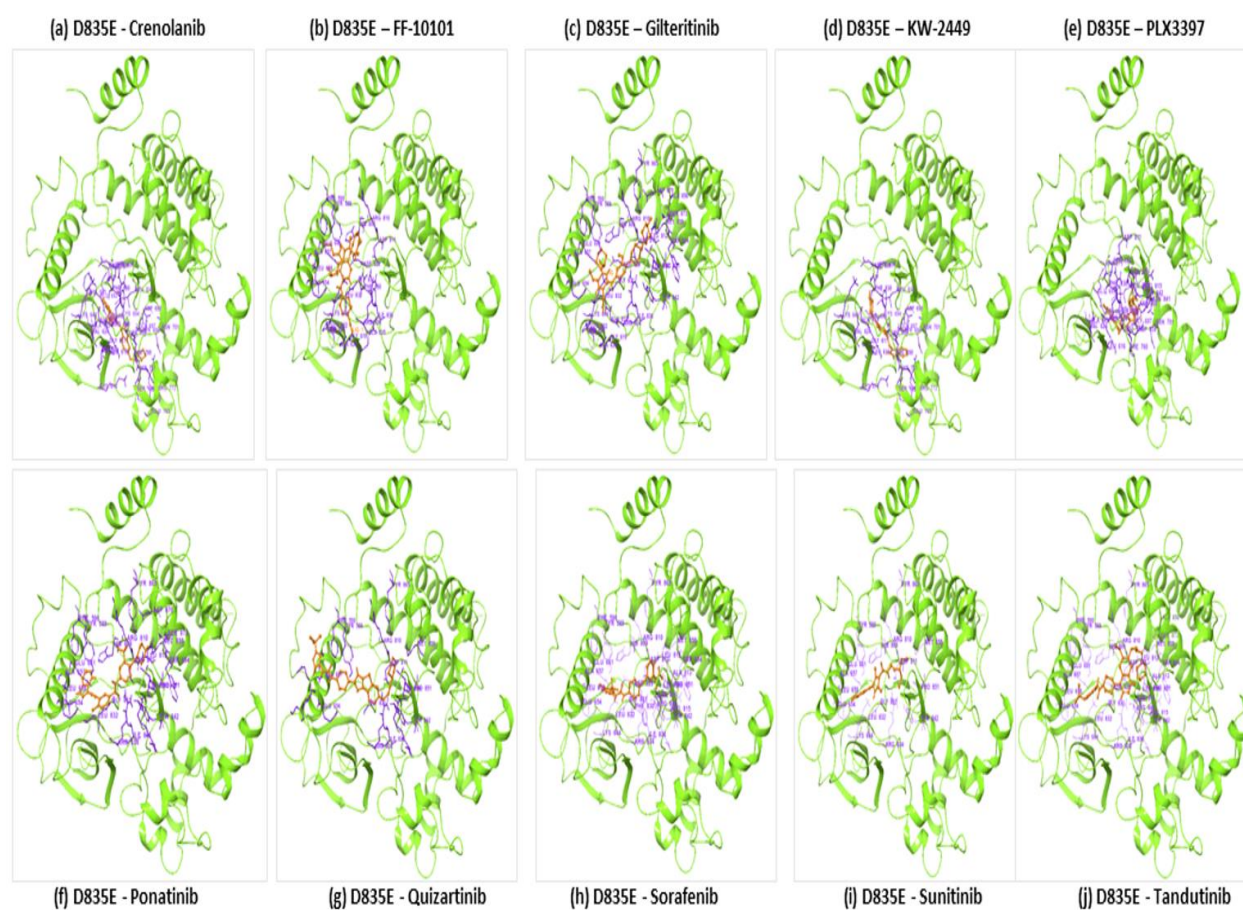

**Figure S5:** The interaction of D835F-mutant FLT3 proteins with AML inhibitors. The D835F-mutant FLT3 structure was shown in cartoon style (blue) and AML inhibitors were displayed in stick style. The interactive residues of native FLT3 were represented in stick model along with the residues label.

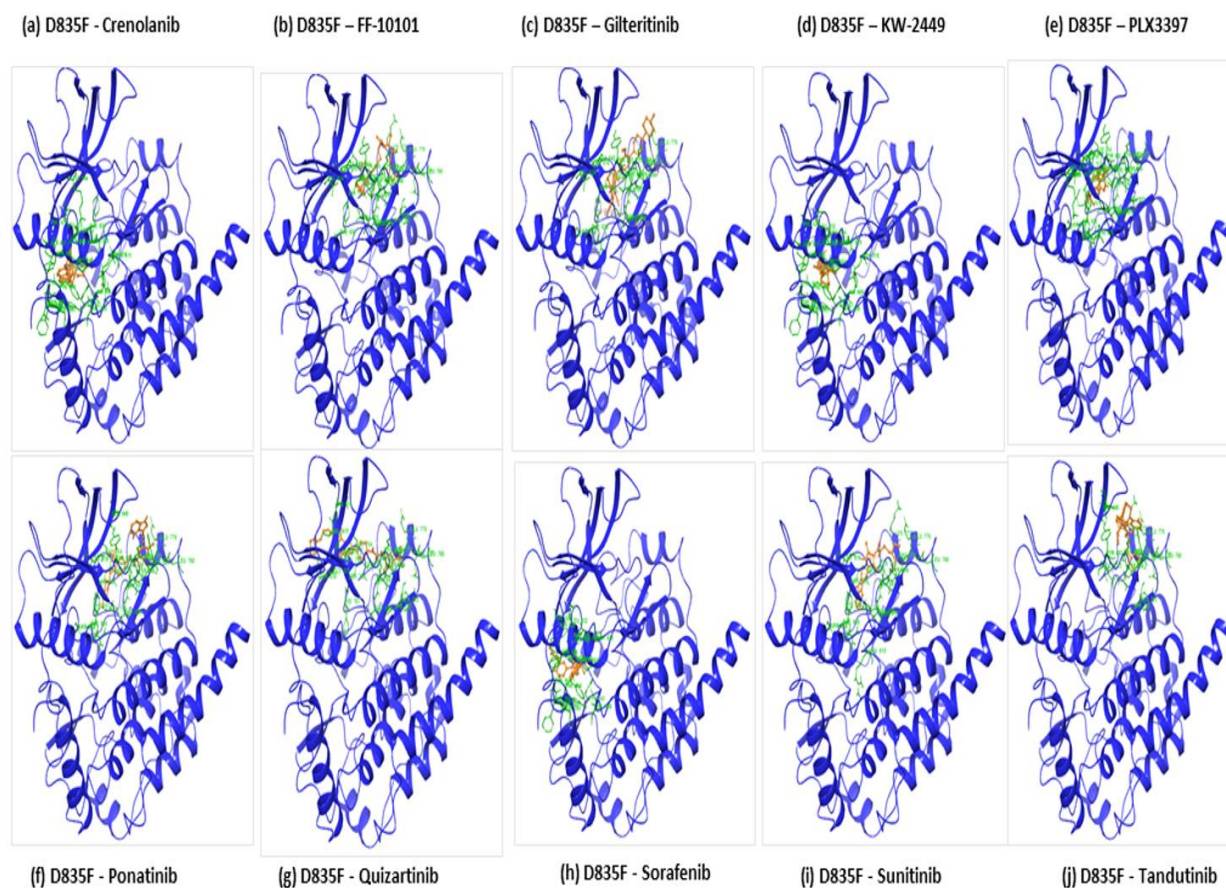

**Figure S6:** The interaction of D835G-mutant FLT3 proteins with AML inhibitors. The D835G-mutant FLT3 structure was shown in cartoon style (yellow) and AML inhibitors were displayed in stick style. The interactive residues of native FLT3 were represented in stick model along with the residues label.

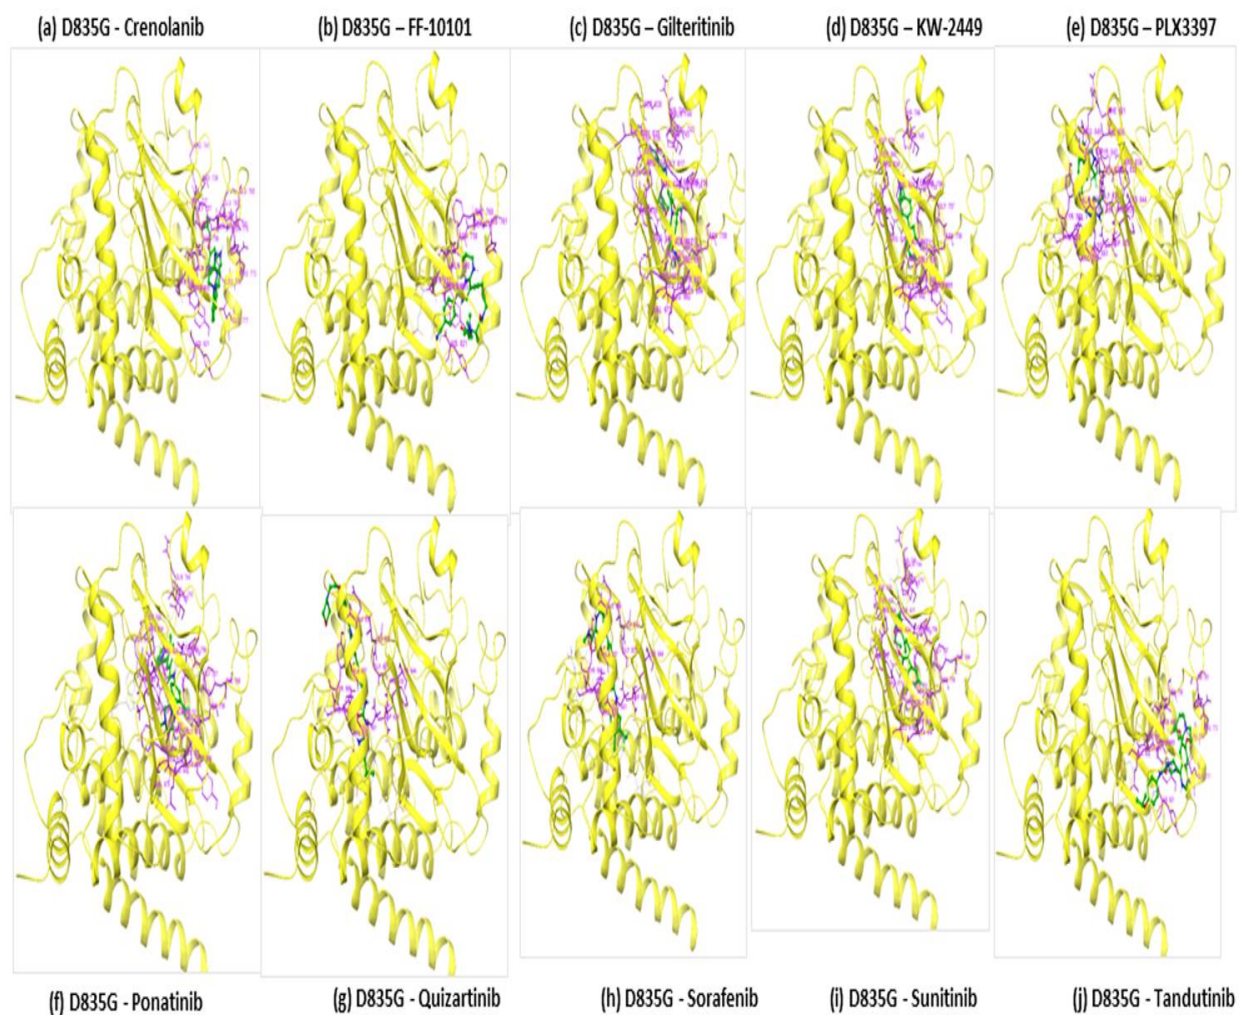



**Figure S7:** The interaction of D835H-mutant FLT3 proteins with AML inhibitors. The D835H-mutant FLT3 structure was shown in cartoon style (cyan) and AML inhibitors were displayed in stick style. The interactive residues of native FLT3 were represented in stick model along with the residues label.

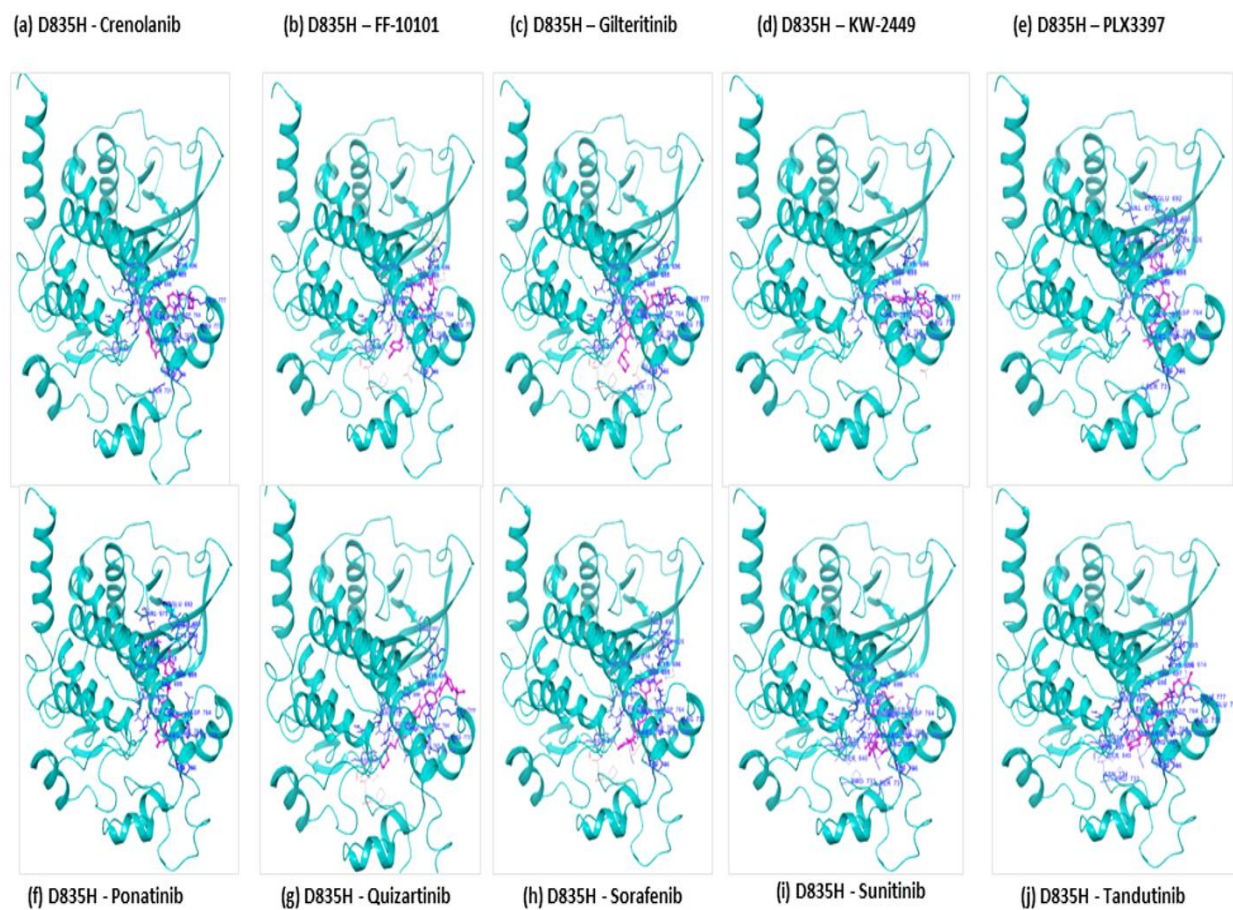

**Figure S8:** The interaction of D835I-mutant FLT3 proteins with AML inhibitors. The D835I-mutant FLT3 structure was shown in cartoon style (Magenta) and AML inhibitors were displayed in stick style. The interactive residues of native FLT3 were represented in stick model along with the residues label.

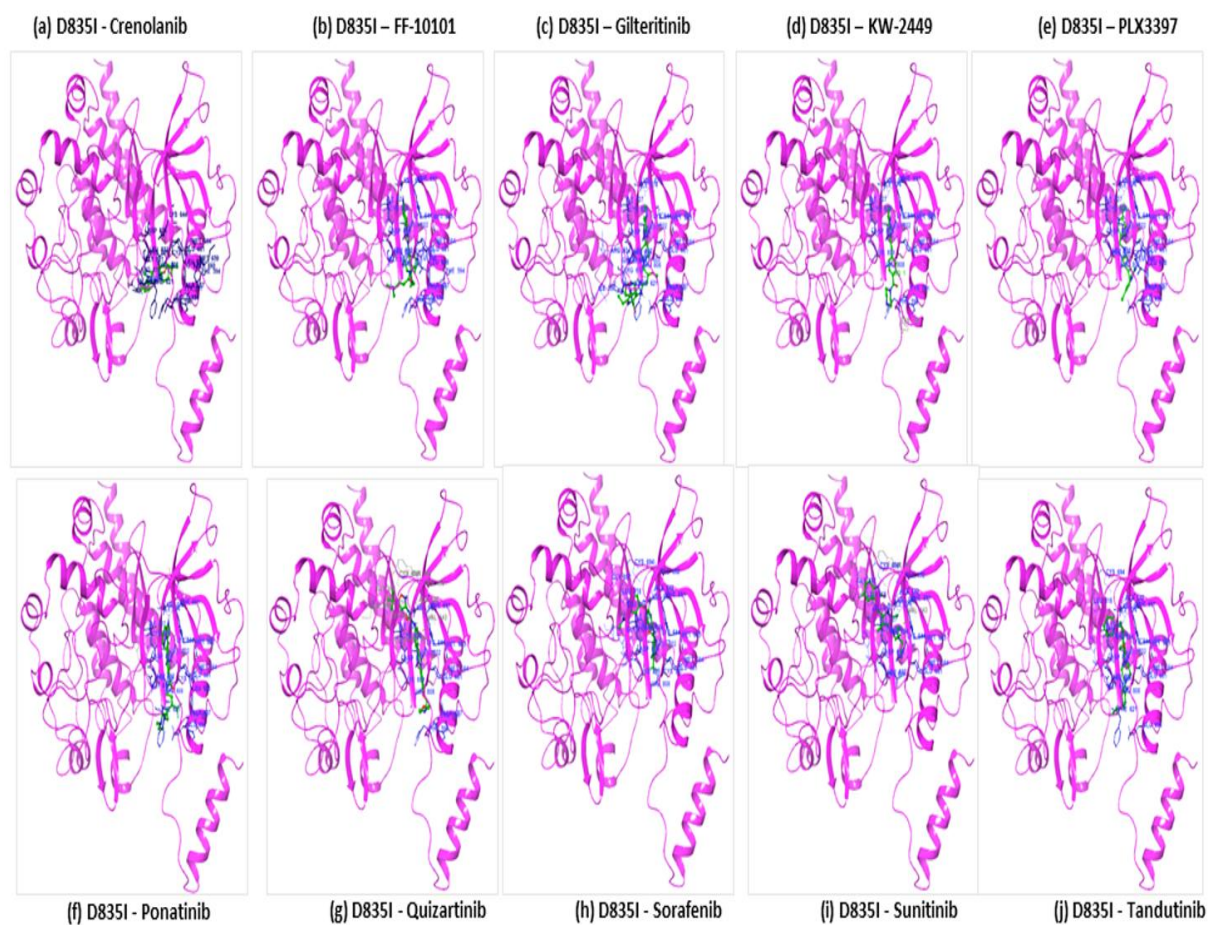

**Figure S9:** The interaction of D835N-mutant FLT3 proteins with AML inhibitors. The D835N-mutant FLT3 structure was shown in cartoon style (purple) and AML inhibitors were displayed in stick style. The interactive residues of native FLT3 were represented in stick model along with the residues label.

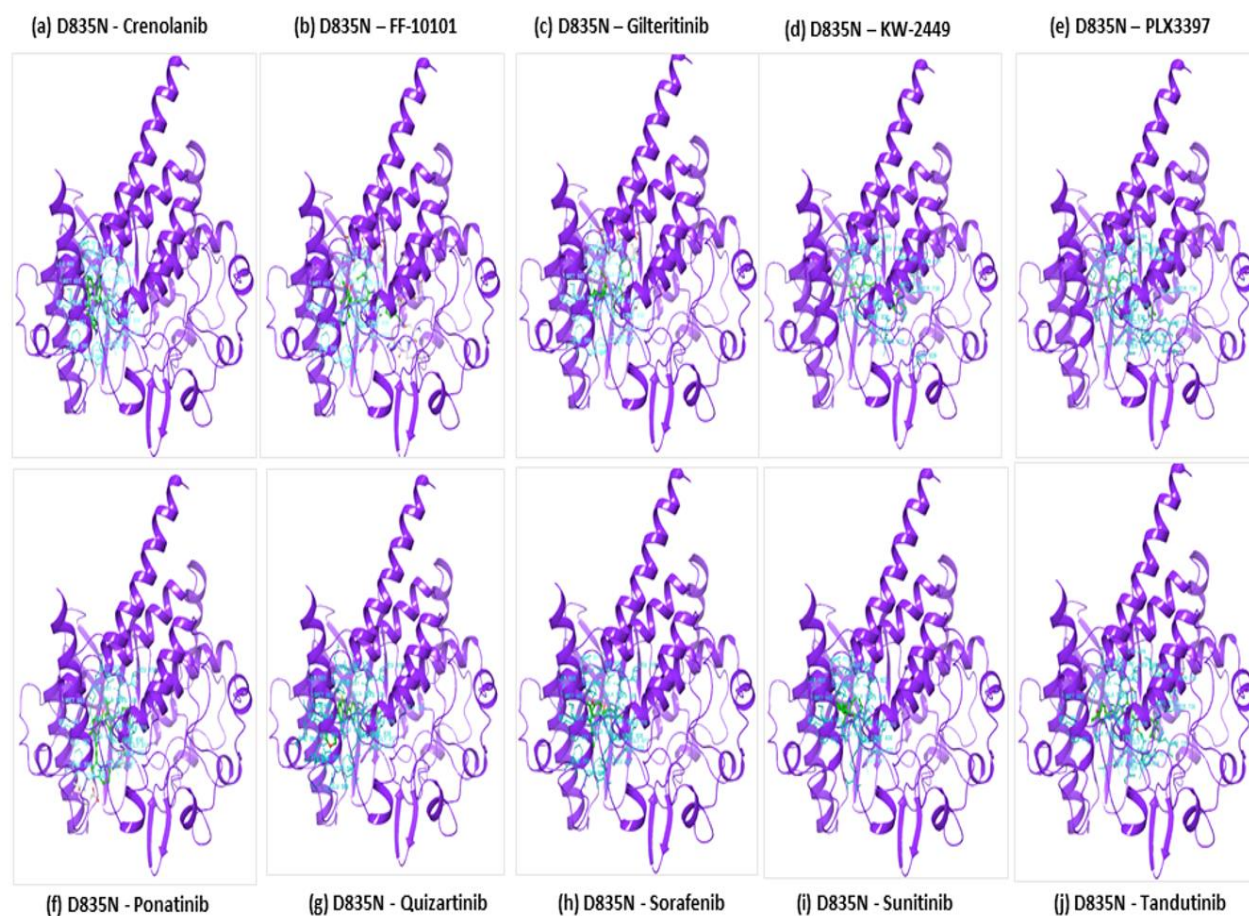



**Figure S10:** The interaction of D835V-mutant FLT3 proteins with AML inhibitors. The D835V-mutant FLT3 structure was shown in cartoon style (Maroon) and AML inhibitors were displayed in stick style. The interactive residues of native FLT3 were represented in stick model along with the residues label.

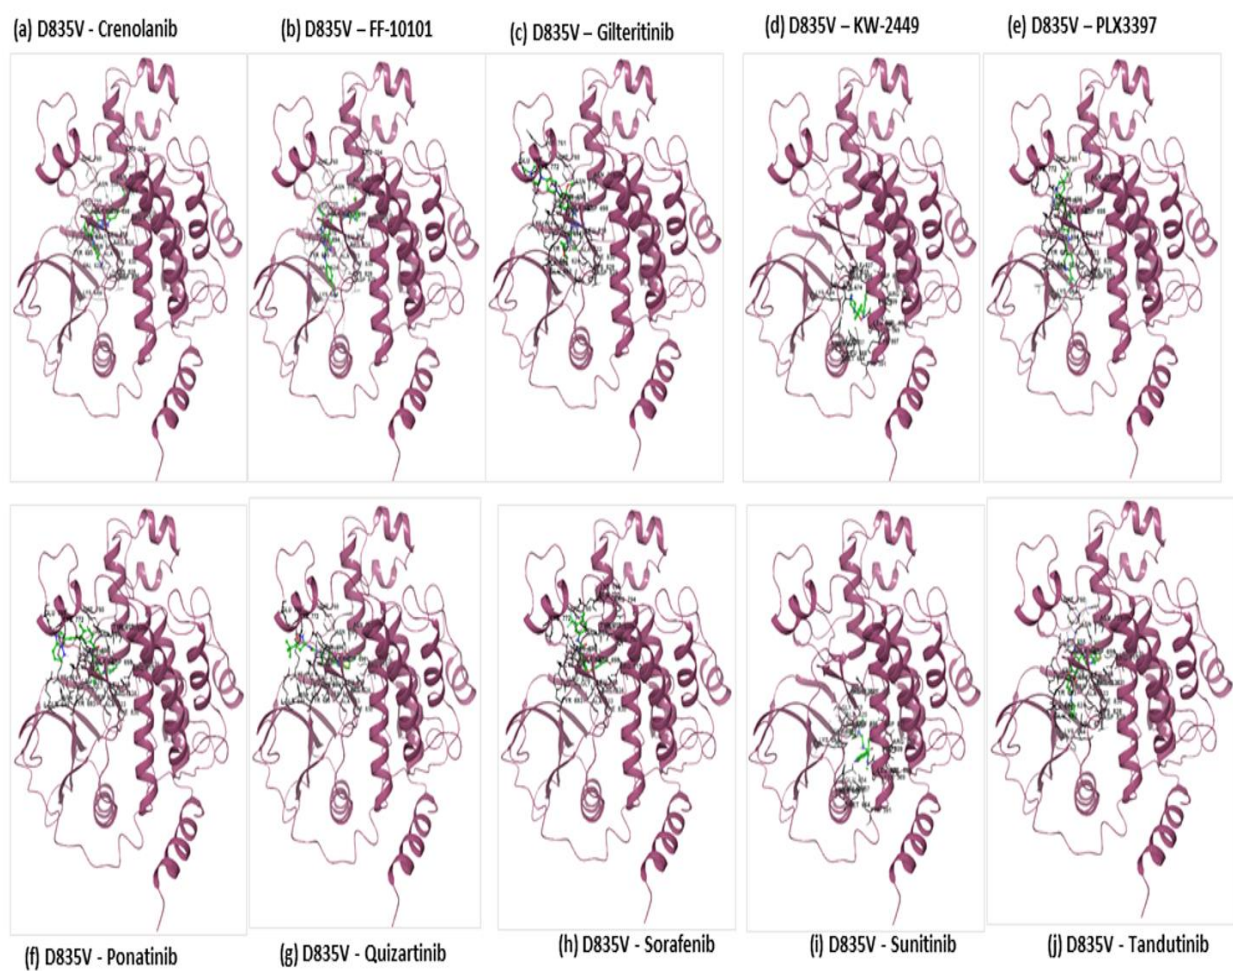

**Figure S11:** The interaction of D835Y- mutant FLT3 proteins with inhibitors. The D835Y-mutant FLT3 structure was shown in cartoon style (green) and AML inhibitors were displayed in stick style. The interactive residues of native FLT3 were represented in stick model along with the residues label.

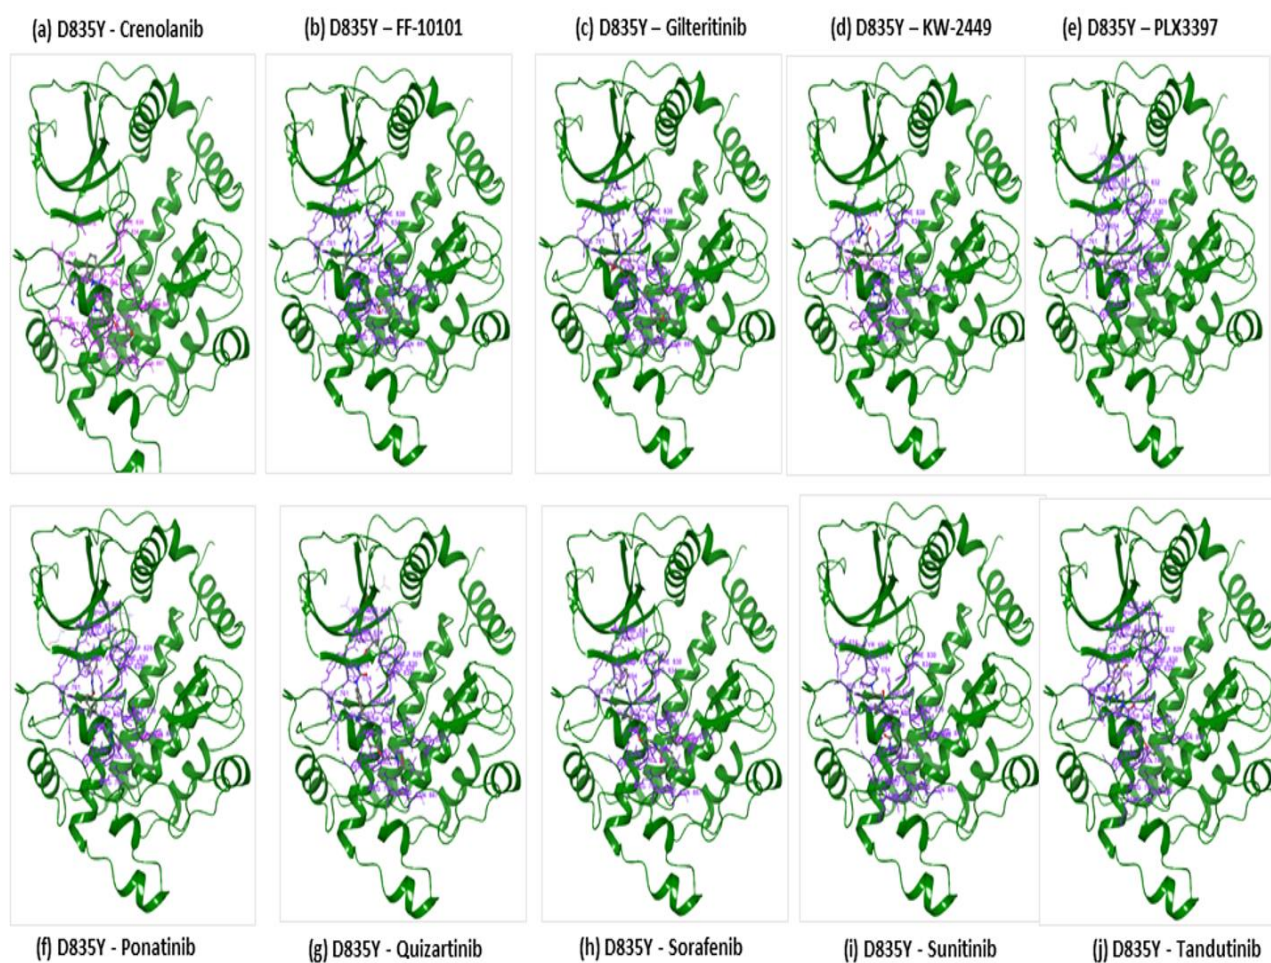

Supplement: s1 [file s1]
